# Supplementary material
Source: PubMed Central journal article supplement (PMC7876861)
Supplement: ao0c05520_si_001.pdf [file ao0c05520_si_001.pdf]

**Supplementary Information for**

**Enhancing Tumor Accumulation and Cell Uptake of Layered Double Hydroxide Nanoparticles by Coating/Detaching pH-Triggered Charge-Convertible Polymer**

*Tiefeng Xu<sup>†,§,#</sup>, Jianping Liu<sup>‡,#</sup>, Luyao Sun<sup>‡</sup>, Run Zhang<sup>‡</sup>, Zhi Ping Xu<sup>‡,\*</sup>, Qing Sun<sup>†,\*</sup>*

<sup>†</sup> Shandong Qianfoshan Hospital, Cheeloo College of Medicine, Shandong University, Jinan City, Shandong Province 250014, China.

<sup>§</sup> The First Affiliated Hospital and The Oncological Institute of Hainan Medical University, Haikou City, Hainan Free Trade Port 570102, China.

<sup>‡</sup> Australian Institute for Bioengineering and Nanotechnology (AIBN), The University of Queensland, St Lucia, QLD 4072, Australia

<sup>#</sup> These authors contribute equally to this work.

<sup>\*</sup> Corresponding authors.

Email: [qingsw99@163.com](mailto:qingsw99@163.com) (Qing Sun)

Email: [gordonxu@uq.edu.au](mailto:gordonxu@uq.edu.au) (Z. P. Xu)

**Contents:**

1. Scheme S1-S2
2. Figure S1-S7
3. Table S1-S4

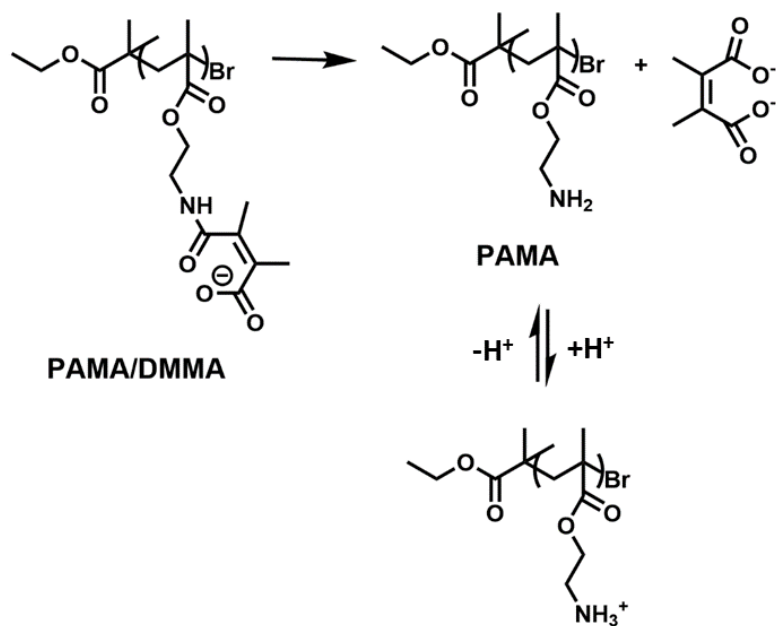

**Scheme S1.** Mechanism of charge conversion of PAMA/DMMA at pH 6.8.

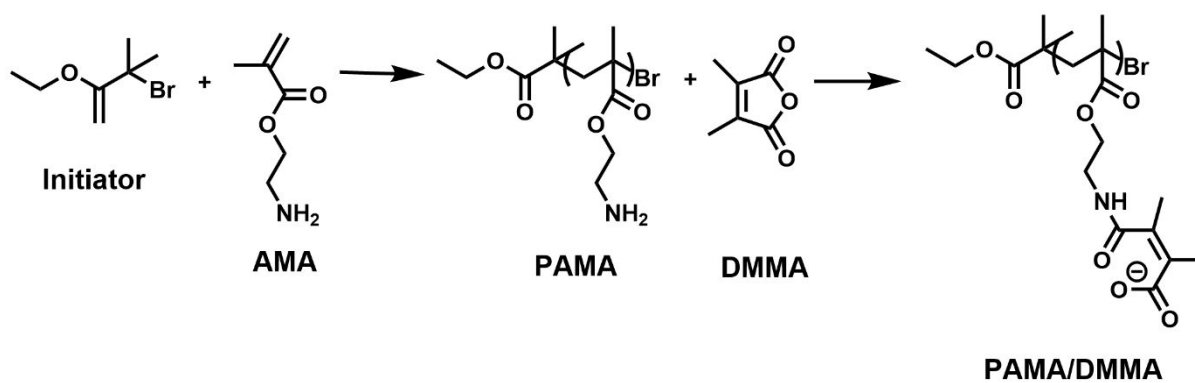

**Scheme S2.** Synthesis route of PAMA/DMMA.

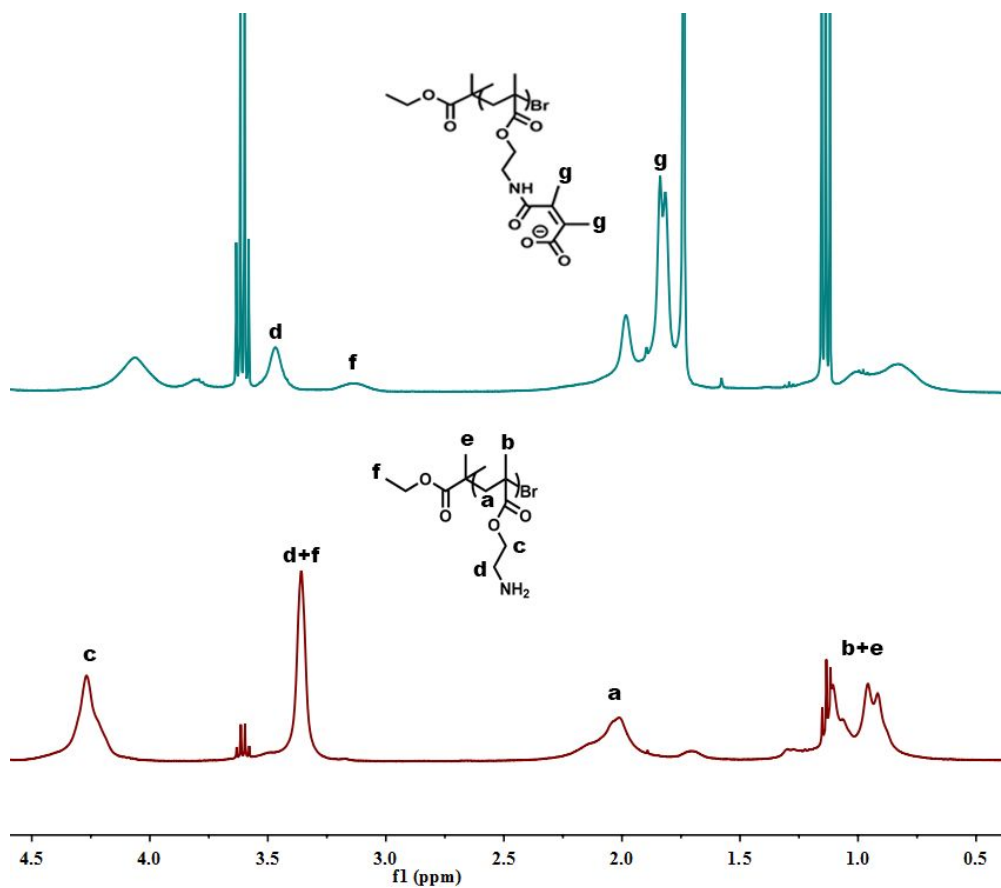

**Figure S1.** <sup>1</sup>H NMR spectra of PAMA and PAMA/DMMA.

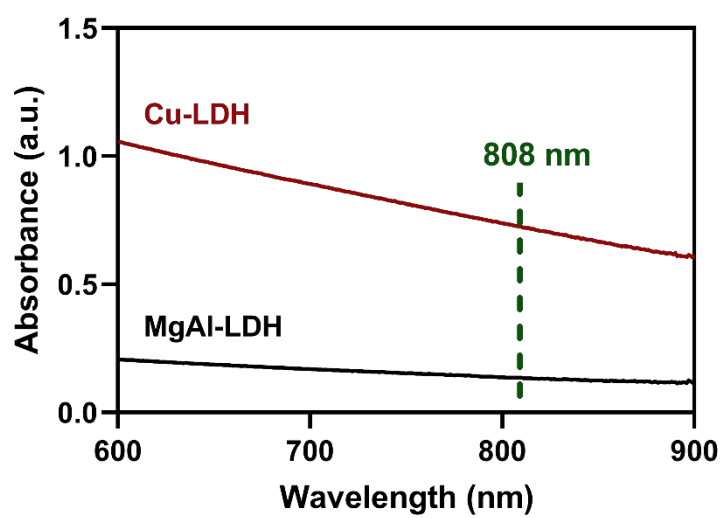

**Figure S2.** UV-Vis spectrum of Cu-LDH at [Cu] = 125 μg/mL.

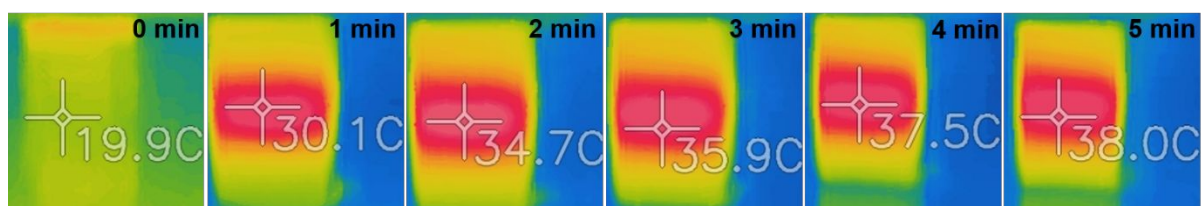

**Figure S3.** Infrared thermal images of deionized water and aqueous Cu-LDH nanoparticles with different copper concentrations ( $[\text{Cu}]$ : 125  $\mu\text{g/mL}$ ) under 808 nm laser irradiation with a power density of 1.0  $\text{W/cm}^2$  for 5 min.

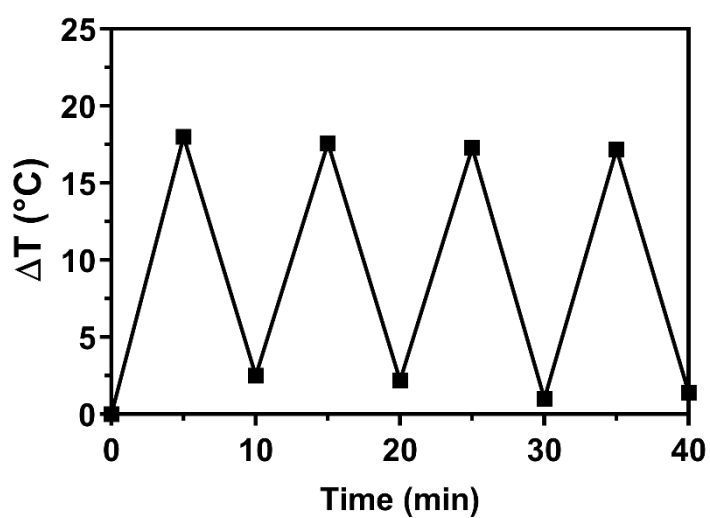

**Figure S4.** Photostability tests of Cu-LDH suspension for five cycles at  $[\text{Cu}] = 125 \mu\text{g/mL}$  under 808 nm laser irradiation with a power density of 1.0  $\text{W/cm}^2$  for 5 min.

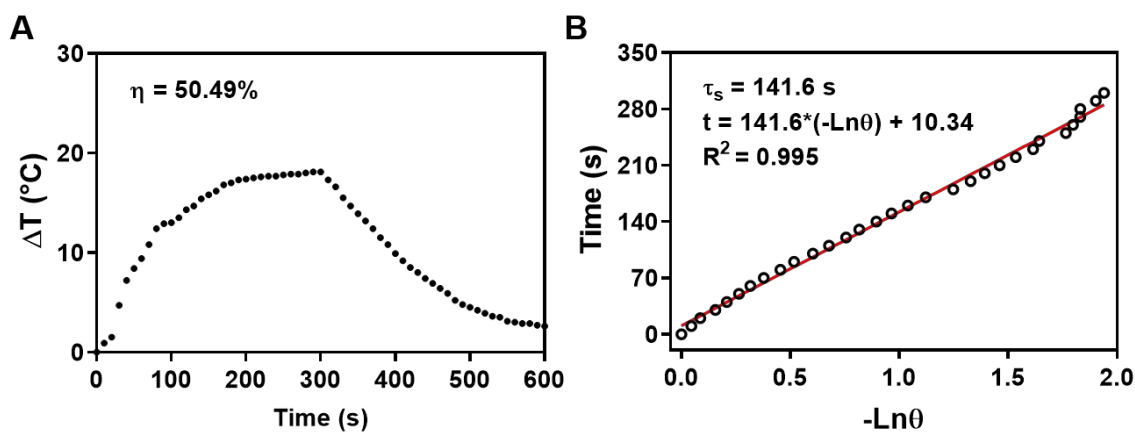

**Figure S5.** (A) Temperature profiles of Cu-LDH irradiated with 808 nm laser for 300 s, followed by a natural cooling for 300 s (laser was turned off). (B) The determination of system time constant ( $\tau_s$ ) calculated by the linear regression of the 300 s-cooling profile of Cu-LDH.

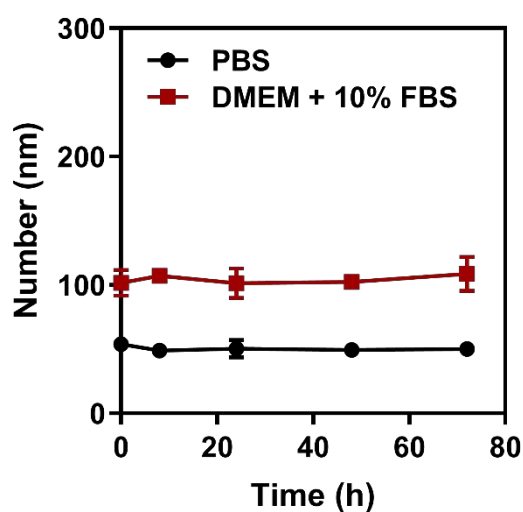

**Figure S6.** Colloidal stability of Cu-LDH@PAMA/DMMA in PBS and DMEM with 10 % FBS.

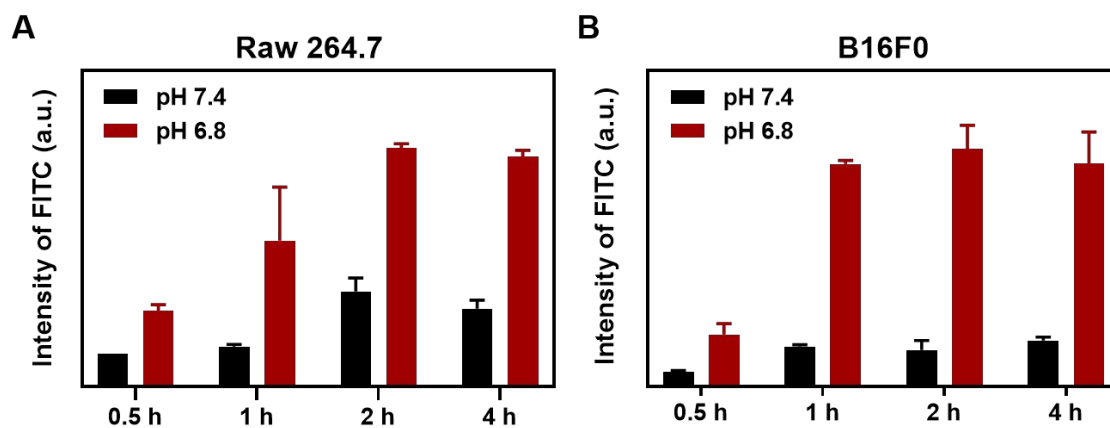

**Figure S7.** Time-dependent cellular uptake of Cu-LDH@PAMA/DMMA in Raw 264.7 cells (A) and B16F0 cells (B).

**Table S1.** GPC data of PAMA and PAMA/DMMA.

| Polymers       | $M_n$ (Da) | $M_w$ (Da) | PDI   | DP |
|----------------|------------|------------|-------|----|
| PAMA $_n$      | 4685       | 5209       | 1.112 | 28 |
| PAMA/DMMA $_n$ | 6988       | 7388       | 1.057 | 18 |

**Table S2.** Size and Zeta potential of Cu-LDH@PAMA/DMMA at different mass ratios of PAMA/DMMA to LDH.

| <b>PAMA/DMMA<br/>: Cu-LDH</b> | <b>Cu-LDH@PAMA/DMMA</b> |       |              |
|-------------------------------|-------------------------|-------|--------------|
|                               | Number<br>(nm)          | PDI   | Zeta<br>(mV) |
| Cu-LDH                        | 39.4                    | 0.115 | +33.7        |
| 5:1                           | 52.2                    | 0.112 | -26.6        |
| 4:1                           | 53.7                    | 0.112 | -25.2        |
| 3:1                           | 50.9                    | 0.126 | -25.6        |
| 2:1                           | 90.9                    | 0.127 | -21.9        |
| 1:1                           | 120.6                   | 0.141 | -11.5        |
| 0.5:1                         | 152.1                   | 0.373 | -8.3         |
| 0.2:1                         | 283.4                   | 0.412 | -6.9         |



**Table S3.** Coating content calculated based on the carbon amounts of nanoparticles and TGA analysis.

| Method | Elements       | Cu-LDH <sup>#</sup> | Cu-LDH@PAMA/DMMA  |
|--------|----------------|---------------------|-------------------|
| ICP    | Cu             | 15                  | -                 |
|        | Mg             | 15.5                | -                 |
|        | Al             | 8                   | -                 |
| CHN    | C              | 0.8                 | 32.6              |
|        | H              | 3.9                 | 5.1               |
|        | N              | 0                   | 4.1               |
|        | (Est. Coating) | -                   | 66.2*             |
| TGA    | Weight Loss    | 42.1                | 83.4              |
|        | (Est. Coating) | -                   | 71.3 <sup>§</sup> |

<sup>#</sup> The approximate chemical formula was  $\text{Cu}_{0.8}\text{Mg}_{2.2}\text{Al}(\text{OH})_8\text{Cl}_{0.6}(\text{CO}_3^{2-})_{0.2}\cdot 2\text{H}_2\text{O}$ .

<sup>\*</sup> The weight % was estimated based on C weight % as the polymer contains 48.4% C in their chemical formula.

<sup>§</sup> The weight % was estimated from the weight loss in TGA by the following equation:

$$\text{coating wt\%} = \text{measured weight loss \% of coated Cu-LDH} - \text{measured weight loss \% of Cu-LDH} \times \text{weight percent of Cu-LDH},$$

where weight percent of Cu-LDH is  $100\% - \text{coating wt\%}$ . Here polymer or BSA was supposed to all decompose at 800 °C in arial TGA and the weight loss was read at 800 °C.

**Table S4.** Comparison of various Cu-based nanoparticles for magnetic resonance imaging (MRI).

| Nanomaterials           | r1 (mM <sup>-1</sup> s <sup>-1</sup> ) | Magnetic field | Ref       |
|-------------------------|----------------------------------------|----------------|-----------|
| <b>CuS</b>              | 0.26                                   | 3.0 T          | 1         |
|                         | 0.12                                   | 7.0 T          | 2         |
| <b>CuCl<sub>2</sub></b> | 0.21                                   | 9.4 T          | 3         |
| <b>Cu oleate</b>        | 4.02                                   | 3.0 T          | 4         |
| <b>Cu<sub>3</sub>P</b>  | 0.59                                   | 3.0 T          | 5         |
| <b>CuO</b>              | 0.38                                   | 9.4 T          | 6         |
| <b>Cu-LDH</b>           | 0.98 (pH 7.4)                          | 16.0 T         | This work |
|                         | 2.83 (pH 6.0)                          |                |           |

## References

- (1) Chu, Z.; Wang, Z.; Chen, L.; Wang, X.; Huang, C.; Cui, M.; Yang, D.-P.; Jia, N. Combining magnetic resonance imaging with photothermal therapy of CuS@BSA nanoparticles for cancer theranostics. *ACS Appl. Nano Mater.* **2018**, *1*, 2332-2340.
- (2) Xia, C.; Xie, D.; Xiong, L.; Zhang, Q.; Wang, Y.; Wang, Z.; Wang, Y.; Li, B.; Zhang, C. Nitroxide radical-modified CuS nanoparticles for CT/MRI imaging-guided NIR-II laser responsive photothermal cancer therapy. *RSC Adv.* **2018**, *8*, 27382-27389.
- (3) Ge, R.; Lin, M.; Li, X.; Liu, S.; Wang, W.; Li, S.; Zhang, X.; Liu, Y.; Liu, L.; Shi, F.; Sun, H.; Zhang, H.; Yang, B. Cu<sup>2+</sup>-loaded polydopamine nanoparticles for magnetic resonance imaging-guided pH- and near-infrared-light-stimulated thermochemotherapy. *ACS Appl. Mater. Interfaces* **2017**, *9*, 19706-19716.
- (4) Pan, D.; Caruthers, S. D.; Senpan, A.; Yalaz, C.; Stacy, A. J.; Hu, G.; Marsh, J. N.; Gaffney, P. J.; Wickline, S. A.; Lanza, G. M. Synthesis of NanoQ, a copper-based contrast agent for high-resolution

magnetic resonance imaging characterization of human thrombus. *J. Am. Chem. Soc.* **2011**, *133*, 9168-9171.

(5) Liu, Y.; Wu, J.; Jin, Y.; Zhen, W.; Wang, Y.; Liu, J.; Jin, L.; Zhang, S.; Zhao, Y.; Song, S.; Yang, Y.; Zhang, H. Copper(I) phosphide nanocrystals for in situ self-generation magnetic resonance imaging-guided photothermal-enhanced chemodynamic synergetic therapy resisting deep-seated tumor. *Adv. Funct. Mater.* **2019**, *29*, 1904678.

(6) Perlman, O.; Weitz, I. S.; Azhari, H. Copper oxide nanoparticles as contrast agents for MRI and ultrasound dual-modality imaging. *Phys. Med. Biol.* **2015**, *60*, 5767.
